# Supplementary material for: First historical genome of a crop bacterial pathogen from herbarium specimen: Insights into citrus canker emergence
Source: PLOS journal article supplement (doi:10.1371/journal.ppat.1009714), 2021-07-29
Supplement: S4 (10.1371/journal.ppat.1009714.s004) [file journal.ppat.1009714.s004]

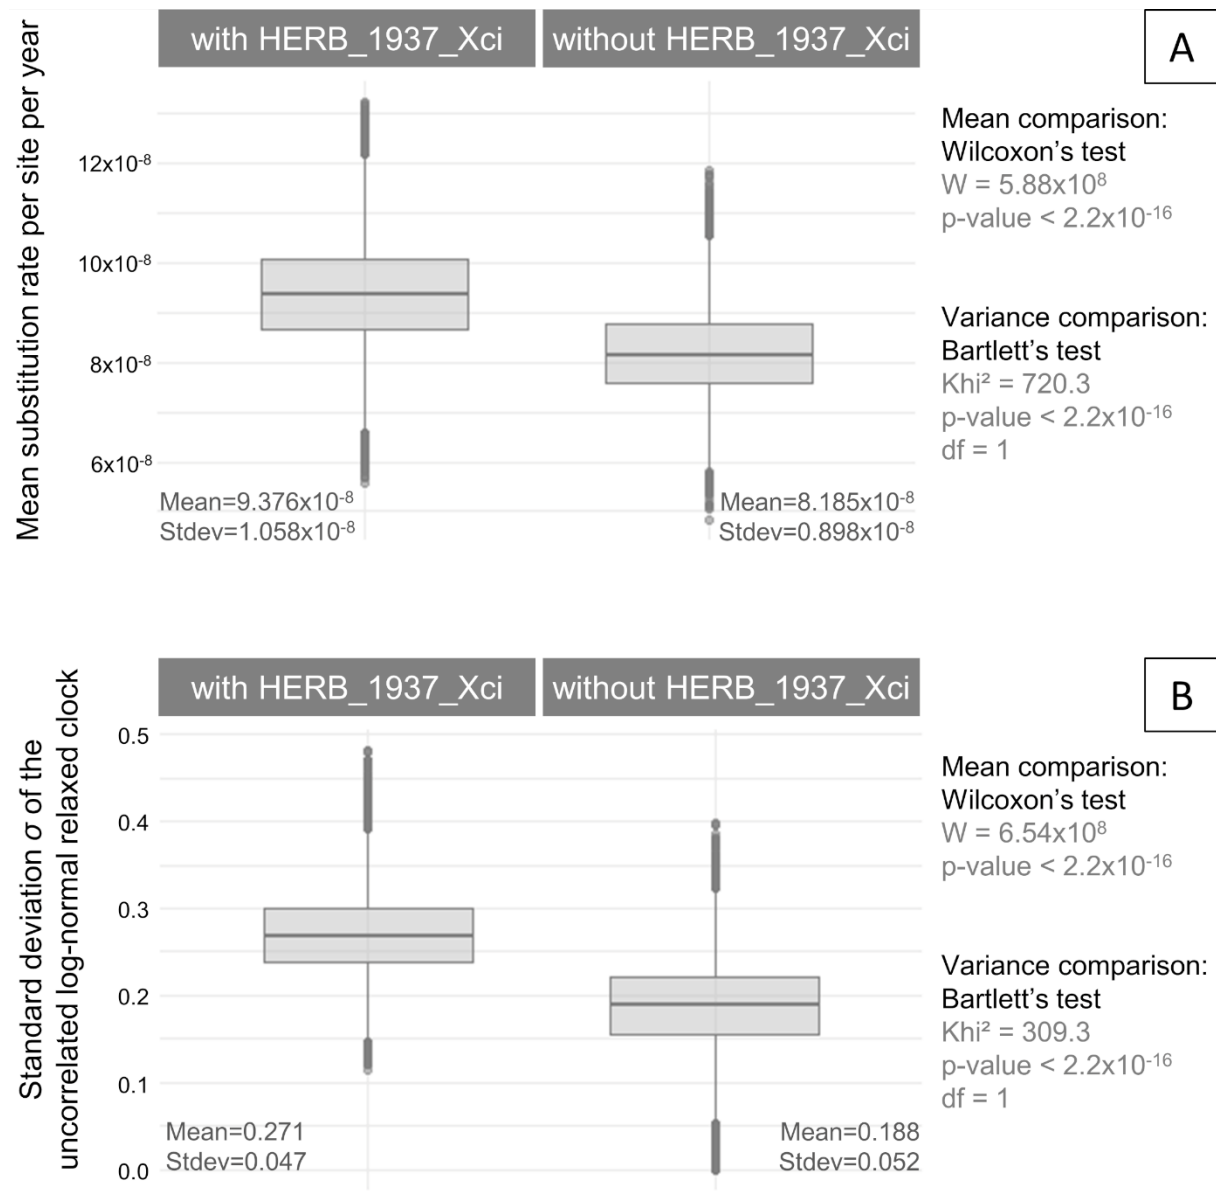

**S4 Fig. Effect of integrating HERB\_1937\_Xci on substitution rate estimates in BEAST.**

Boxplot distribution of mean substitution rate per site per year (A) and standard deviation of the uncorrelated log-normal relaxed clock among dated BEAST tree branches (B), with and without integrating the historical HERB\_1937\_Xci chromosome sequence in the BEAST analysis, and associated statistical comparisons. Boxes represent 25<sup>th</sup> to 75<sup>th</sup> percentiles, Minimum-Maximum intervals are displayed by a vertical bar and outliers as circles.
